1 Insect immune specificity in a host-parasite model

2

3

4 C.E. Riddell<sup>1</sup>, J.D. Lobaton Garces<sup>1</sup>, S. Adams<sup>2</sup>, D. Twell<sup>1</sup> & E.B. Mallon<sup>1</sup>

5 <sup>1</sup>Department of Biology, University of Leicester, U.K.

6 <sup>2</sup> School of Life Sciences, University of Warwick, U.K.

7

8

9 Abstract

10 Ecological studies routinely show host-parasite genotype-genotype interactions in insect systems.  
11 The mechanisms behind these interactions are not clearly understood. Using the bumblebee *Bombus*  
12 *terrestris* / trypanosome *Crithidia bombi* model system, we have carried out a transcriptome-wide  
13 analysis of gene expression in bees during *C. bombi* infection. We have performed three analyses,  
14 comparing expression in infected and non-infected bees 24 hours after infection by *Crithidia bombi*,  
15 expression at 24 and 48 hours after *C. bombi* infection and most importantly searching for  
16 differential gene expression associated with the host-parasite genotype-genotype interaction at 24  
17 hours after infection. We found a large number of genes differentially regulated related to numerous  
18 canonical immune pathways. These genes include receptors, signaling pathways and effectors. We  
19 discovered a possible interaction between the peritrophic membrane and the insect immune system  
20 in defense against *Crithidia*. Most interestingly we found differential expression of *Dscam*  
21 depending on the genotype-genotype interactions of the given bumblebee colony and *Crithidia*  
22 strain.  
23

24 Ecological studies with a number of natural, co-evolving host-parasite systems have shown that  
25 resistance to a parasite is highly variable in invertebrates, in part determined by the interaction of  
26 the genotypes of the host and the parasite (Schmid-Hempel 2001; Carius *et al.* 2001; Lambrechts  
27 2010). Such interactions can lead to the evolution and maintenance of genetic variation in natural  
28 populations (Hamilton *et al.* 1981). Many human diseases use insects as vectors (Jacobslorena &  
29 Lemos 1995). Any effort at control will require a better understanding of this relationship between  
30 host and parasite.

31

32 How this level of specificity is generated is unclear. Genotype-genotype interactions quantified by  
33 ecological measures of disease resistance (e.g., host mortality, fecundity and infection rate) cannot  
34 explicitly test whether the immune response produces this level of specificity (Hauton & Smith  
35 2007). It may be that such outcomes can be explained by other processes. For example, the  
36 bumblebee, *Bombus terrestris*/trypanosome *Crithidia bombi* system is a well studied example of  
37 these ecological host x parasite genotype-genotype interactions (Schmid-Hempel *et al.* 1999;  
38 Schmid-Hempel & Reber-Funk 2004). Yet even here it has been shown that independent of host  
39 genotype, specific isolates of gut microbiota from different hosts are protective against particular  
40 parasite genotypes (Koch & Schmid-Hempel 2012).

41

42 Still there is evidence that the immune system must have a role in generating this host-parasite  
43 specific response. A number of studies have found differential immune genes expression in  
44 response to *Crithidia* (Schlüns *et al.* 2010; Riddell *et al.* 2011; Brunner *et al.* 2013; Barribeau &  
45 Schmid-Hempel 2013). We found increased *Crithidia* loads in bees whose expression of  
46 antimicrobial peptides was knocked down by RNAi (Deshwal & Mallon 2014). We have even  
47 shown that bees from different host genotypes induce differential expression of antimicrobial  
48 peptides (AMPs), according to the strain of *C. bombi* they had been infected with (Riddell *et al.*  
49 2009), that is we found specificity in the immune response itself.

50 Here, we expand our previous study and carry out a transcriptome-wide analysis of gene expression  
51 in bees during *C.bombi* infection. We have carried out three analyses, comparing a) expression in  
52 infected and non-infected bees 24 hours after infection by *Crithidia bombi* b) expression at 24 and  
53 48 hours after *C.bombi* infection and c) looking for differential gene expression associated with the  
54 host-parasite genotype-genotype interaction at 24 hours after infection. Enrichment analysis was  
55 also carried out on expression data to see which categories of molecules are differentially regulated  
56 during infection. The results confirm our previous findings of up-regulation in antimicrobial peptide  
57 expression and provide a comprehensive overview of changes in and the specificity of gene  
58 expression after exposure to 2 strains of *C.bombi*.

59  
60

## 61 **Methods**

62 The samples used during this experiment are taken from Riddell *et al.* 2009 (Riddell *et al.* 2009).  
63 We have chosen samples that showed a reciprocal pattern of expression for the three antimicrobial  
64 peptides (AMPs) tested in that paper. These were colony K5 (called K from now on) and Q1 (Q)  
65 and strains 6 and 8. K-8 showed a high AMP expression, Q-8 a low expression level, Q-6 a high  
66 level and K-6 a low level of AMP expression.

## 67 ***Sample Collection***

68 Experiments were carried out on one commercially reared bumblebee colony from Koppert  
69 Biological Systems U.K. (Colony K) and one colony from wild caught queens (Colony Q). All  
70 parasite isolates used originated from wild queens collected in Spring 2008 in the botanical gardens,  
71 University of Leicester. Experiments began when the colonies had a minimum of thirty workers,  
72 approximately four weeks old. Between observations, colonies were fed *ad libitum* with pollen  
73 (Percie du sert, France) and 50% diluted glucose/fructose mix (Meliose – Roquette, France). Before  
74 and during the experiments colonies were kept at 26°C and 60% humidity in constant red light.

## 75 ***Infections***

76 To prepare *C. bombi* isolates, faeces was collected from workers of naturally infected colonies, and  
77 mixed with 50% diluted Meliose to create a standardized dose of 500 *Crithidia* cells per  $\mu\text{l}$  of  
78 inoculum. Previous studies had shown that such inocula, prepared from different colonies, are  
79 genotypically different (Schmid-Hempel & Reber-Funk 2004) and generate specific responses in  
80 novel hosts (Schmid-Hempel *et al.* 1999). We infected a sample of workers from each of K and Q  
81 bumblebee colonies (representing different host lines) with an inoculum of faeces from each of the  
82 two wild infected colonies (6 and 8 *Crithidia* strain). We also collected uninfected controls. Bees  
83 were four days old at the time of infection. After infection bees were kept in colony x strain groups  
84 (1–3 individuals depending on day collected) and fed *ad libitum*. 24 hours or 48 hours post infection  
85 the bees were sacrificed by freezing in liquid nitrogen. They were then stored at  $-80^{\circ}\text{C}$ .

## 86 ***RNA sample preparation and sequencing***

87 Total RNA was extracted from 23 individual homogenised abdomens using Tri-reagent (Sigma-  
88 Aldrich, UK). Any residual contaminants were removed from the RNA using the RNeasy mini kit  
89 (Qiagen, UK) and manufacturer's RNA clean-up protocol. To remove residual genomic DNA, RNA  
90 samples were treated with DNase (Sigma-Aldrich, UK). TruSeq RNA-seq libraries were made from  
91 the 23 samples at NBAF Edinburgh. Sequencing was performed on an Illumina HiSeq®2000  
92 instrument (Illumina, Inc.) by the manufacturer's protocol. Multiplexed 50 base single-read runs  
93 were carried out yielding an average of 12M reads per sample.

94

## 95 ***Statistical analysis***

96 The reference transcriptome was downloaded from  
97 [http://www.nematodes.org/downloads/databases/Bombus\\_terrestris/](http://www.nematodes.org/downloads/databases/Bombus_terrestris/) (Colgan *et al.* 2011).  
98 Functional annotation related to the transcriptome was obtained using the BLAST2GO package  
99 (Götz *et al.* 2008). Alignment was done using GSNAP (version 2012-07-20) (Wu & Nacu 2010).  
100 Only reads that mapped uniquely were selected for further analysis. Counts were generated per  
101 transcript for each sample.

102

103 Differential expression analysis was performed using the edgeR (3.4.0) package (McCarthy *et al.*  
104 2012) in R (3.0.1) (R Core Team 2013). Normalization factors were computed using the TMM  
105 technique, after which tagwise dispersions were calculated and subjected to a generalized linear  
106 model (GLM). Resulting *p* values were subjected to Benjamini–Hochberg multiple testing  
107 correction to derive FDRs; only transcripts with a FDR < 0.05 were considered for further analysis.  
108 Three separate GLMs were carried out, one looked for transcripts that are differentially expressed  
109 upon infection with *Crithidia* at 24 hours post-infection (~0+colony+infect(yes/no)) infect here are  
110 bees either infected with strain 6 or 8, one looking at the gene expression difference between 24  
111 hours and 48 hours post strain 6 infection (~0+colony + time) and a further GLM that looked for

112 transcripts that were expressed in a specific pattern at 24 hours post-infection (~0+colony\*strain).

113

114 Using Blast2Go, we then carried out an enrichment analysis (Fisher exact test) on each of these lists  
115 of differentially expressed genes to see which GO terms are overrepresented relative to the entire  
116 genome. We then used REVIGO to summarize and visualise these terms (Supek *et al.* 2011).

117

118 For each of the lists of differentially expressed transcripts we also carried out a blastx analysis  
119 against the insect innate immunity database (IID) (Brucker *et al.* 2012). We used the BLOSUM62  
120 matrix with a word size of 3. The results were filtered to only contain hits with an *E*-value <1e-10, a  
121 bit score  $\geq 30$ ,

122

123

## 124 **Results**

### 125 ***Genes differentially expressed at 24 hours post-infection***

126 31,843 unique transcripts were mapped to the transcriptome. 489 transcripts were found to be  
127 differentially expressed 24 hours post-infection (FDR < 0.05), 324 were downregulated and 165  
128 upregulated. Reannotating the transcripts using Blast2GO (blastx against the nr database with  $e <$   
129 0.001), 109 had no BLAST hits. A further 68 had uninformative BLAST hits (anonymous predicted  
130 protein). The remaining 312 were used in the enrichment analysis. Figure 1 shows a summary of the  
131 enriched GO terms found (Fisher's test  $p < 0.05$ ). Defense response (GO:0006952, FDR = 0.047)  
132 and chitin metabolism (GO:0006030, FDR = 0.032) were the only processes significantly enriched  
133 at a more stringent level (FDR < 0.05).

134

#### 135 *Peritrophic membrane:*

136 The peritrophic matrix (PM) forms a layer composed of chitin and glycoproteins that lines the  
137 insect midgut lumen (Kuraishi *et al.* 2011). The PM facilitates digestion and forms a protective  
138 barrier to prevent the invasion of ingested pathogens (Lehane 1997; Kuraishi *et al.* 2011). Fibrillin 1  
139 (BTT14121\_1), a venom protein precursor (BTT32193\_1), Neurotrypsin (BTT07956\_1),  
140 Peritrophin-1-like (BTT01709\_1, BTT22959\_1, BTT37215\_1, BTT42262\_1) and four chitinase  
141 transcripts (Chitinase 3: BTT23997\_1 BTT38724\_1, Chitinase 4 BTT20684\_1, BTT23469\_1) are  
142 downregulated upon infection. Fibrillins are extracellular matrix macromolecules, ubiquitous in the  
143 connective tissues (Isogai *et al.* 2003). BTT32193\_1 was classed as a venom protein, but was also  
144 very similar to Chitinase 3 (blastx  $e = 1e^{-16}$ ). Chitinases modulate the structure and porosity of the  
145 PM (Dinglasan *et al.* 2009). Neurotrypsin is a serine protease expressed in the nervous system  
146 (Gschwend *et al.* 1997). However in the protease domain it shares similarities with Sp22D, a chitin  
147 binding serine protease (Danielli *et al.* 2000). The chitin fibrils of the PM are assembled into a wide  
148 cross-hatched pattern connected by peritrophins (Dinglasan *et al.* 2009). A second group made up  
149 of Peritrophin-1 (BTT05886\_1, BTT20661\_1) and 3 further chitinase transcripts (Chitinase 2



150 :BTT23246\_1, Chitinase 3: BTT39163\_1, Chitinase 4: BTT05313\_1) is upregulated. Figure 2  
151 shows the correlation of expression patterns between these sixteen transcripts related to chitin  
152 metabolism. There is some clustering, but not of any clear functional groups. Taken together  
153 however, this differential expression suggests an important role for the repair or restructuring of the  
154 peritrophic matrix in the bumblebees' response to *Crithidia*.

155

156 When the BLAST searches against the IID and nr databases are combined, eighty nine transcripts  
157 relate to canonical insect immune genes. We describe them in the order receptors, serine proteases,  
158 signalling pathways and effectors (Schmid-Hempel 2005).

159

160 *Receptors:*

161 The Down syndrome cell adhesion molecule (Dscam), a pattern recognition receptor has come to  
162 the forefront of research into insect immune specificity as it has been found to have thousands of  
163 different splice forms and is associated with insect immunity (Smith *et al.* 2011). We found five  
164 downregulated transcripts annotated as immunoglobulin superfamily (*Dscam* included in hit list)  
165 (BTT03519\_1, BTT08682\_1, BTT15814\_1, BTT26724\_1, BTT27678\_1) and one upregulated  
166 transcript (BTT03519\_1).

167

168 *Serine proteases:*

169 Serine proteases are important proteolytic enzymes in many molecular pathways. When these serine  
170 proteases are no longer needed, they are inactivated by serine protease inhibitors (Zhao *et al.* 2012).  
171 CLIP domain serine proteases mediate insect innate immunity (Zou *et al.* 2006). Twenty one  
172 transcripts related to serine proteases, serine protease homologues or serine protease inhibitors were  
173 differentially expressed upon infection (see Table 1) . Lipophorin receptor 2 (downregulated  
174 BTT34617\_1) binds with serpins to aid in their encytocytosis (Soukup *et al.* 2009).

175

176 *Signalling pathways:*

177 We found a transcript for *Spatzle* (BTT19738\_1) downregulated at this time point. Activation of the  
178 Toll immune pathway requires the activation of *Spatzle* (Lemaitre & Hoffmann 2007). MyD88  
179 (upregulated BTT15687\_1) is a death domain-containing adaptor activated by Toll leading to the  
180 activation of *Pelle*. *Dorsal* (BTT25273\_1) was also downregulated. The nuclear translocation of  
181 *Dorsal*, a member of the NF- $\kappa$ B family, in the Toll pathway induces the expression of many  
182 immune genes. We found an upregulated transcript (BTT09662\_1) for *Helicase89B* part of the Toll  
183 and Imd Pathway. It is required downstream of NF- $\kappa$ B for the activation of AMP genes in  
184 *Drosophila melanogaster* (Yagi & Ip 2005). *ird5* codes for a catalytic subunit of an IkappaB kinase  
185 that cleaves Relish. Relish (Imd pathway) is an essential regulator of antimicrobial peptide gene  
186 induction. We found *ird5* (BTT03904\_1) to be downregulated 24 hours post-infection.

187

188 In mammals semaphorins are crucially involved in various aspects of the immune response  
189 (Takamatsu & Kumanogoh 2012). A semaphorin-5A-like transcript (BTT01850\_1) was  
190 downregulated 24 hours post-infection. Semaphorin regulates the activity of Ras-family small  
191 GTPases (Takamatsu & Kumanogoh 2012). A Ras-like protein11B transcript (BTT05368\_1) was  
192 also down regulated. The Ras/MAPK pathway was found to be essential for the suppression of the  
193 Imd immune pathway in *Drosophila* (Ragab *et al.* 2011).

194

195 The downregulated Drumstick (BTT13062\_1) interacts with the JAK/STAT pathway during its'  
196 development role (Johansen *et al.* 2003), but we could not find any information about its immune  
197 role. Two transcripts (BTT11590\_1, BTT14205\_1) of *Puckered* were downregulated. *Puckered*,  
198 which codes for a dual specificity phosphatase, is a key regulator of the c-Jun-N-terminal kinase  
199 (JNK) immune pathway (Karkali & Panayotou 2012). Mpk2/p38a (downregulated BTT05769\_1) is  
200 involved in the JNK Pathway and JAK/STAT Pathway. Heat-shock factor activation by p38 is a  
201 recently discovered part of antimicrobial reactions in flies (Chen *et al.* 2010). We found two heat

202 shock protein transcripts (BTT23758\_2, BTT37030\_1) and one other (BTT17701\_1) that were  
203 downregulated and upregulated respectively. These are all involved in the JAK/STAT pathway.

204

205 *Effectors:*

206 Our previous paper (Riddell *et al.* 2011) found that antimicrobial peptides were upregulated at 24  
207 hours post-infection. We would expect the same to be true here. Indeed, we found 5 transcripts for  
208 defensin (BTT06274\_2, BTT8490\_1, BTT10405\_1, BTT14019\_1, and BTT42034\_1) and 3  
209 transcripts for hymenoptaecin (BTT18071\_1, BTT24170\_1, BTT24170\_2), all upregulated. An  
210 apidaecin precursor (BTT33652\_1) was downregulated. Apidaecin has recently been shown to be  
211 expressed in bumblebees (Colgan *et al.* 2011). The downregulated beta-amyloid-like protein  
212 (BTT20240\_1) has been shown to be an antimicrobial peptide in mammals (Soscia *et al.* 2010).  
213 Hemolectin (BTT15326\_1, upregulated) is a clotting protein known to have a role against gram  
214 negative bacteria (Lesch *et al.* 2007).

215

216 Reactive oxygen species (ROS) are generated by respiration in the mitochondria or as part of the  
217 immune response (Molina-Cruz *et al.* 2008). P450 cytochromes are oxidases acting terminally in  
218 monooxygenase systems (Felix & Silveira 2012). Some are regulated in response to infection  
219 possibly either as direct immune responders (Vlachou *et al.* 2005), producing nitric oxide (NO) or  
220 other reactive oxygen radicals or as part of the host detoxification process decreasing oxidative  
221 stress after an infection (Molina-Cruz *et al.* 2008). A number of *cytochromes P450* were  
222 differentially expressed 24 hours post infection. Ten cytochrome p450 transcripts (*Cyp4p3*:  
223 BTT05294\_1, BTT20848\_1, BTT22253\_1, BTT23317\_1, BTT32674\_1, *cytochrome P450 4g15*:  
224 BTT23811\_1, BTT32459\_1, *cytochrome P450 6k1*: BTT35547\_1, BTT40653\_1, *cytochrome P450*  
225 *6a14*: BTT38445\_1) were found to be downregulated. Three other *cytochrome P450* transcripts  
226 (*Cyp4p3*: BTT21216\_1, BTT35543\_1, *cytochrome P450 315a1*: BTT26726\_1) were upregulated.  
227 Several other cytochromes (cytochrome b: BTT20524\_1, BTT39776\_1, BTT41896\_1, and

228 cytochrome c: BTT05255\_2) were downregulated.

229

230 Numerous other actors in the production of ROS were found to be differentially expressed. *TPX4*  
231 (BTT13285\_1), coding for a Thioredoxin-dependent peroxidase, was downregulated. This gene was  
232 found to be differentially expressed during *Plasmodium* infection in *Anopheles gambiae* (Baton *et al.*  
233 2009). Thioredoxin-dependent peroxidase detoxifies H<sub>2</sub>O<sub>2</sub>. Calcineurin (BTT08150\_1,  
234 BTT26273\_1) was found to be downregulated 24 hours post-infection. This agrees with our  
235 previous findings (Riddell *et al.* 2011). In infected *D. melanogaster* larvae, NO signals are  
236 enhanced by Calcineurin to promote induction of strong, robust immune responses via the Imd  
237 signalling pathway (Dijkers & O'Farrell 2007).

238

239 We found downregulation of sortilin-related receptor-like (BTT31654\_1). In mammals, sortilin aids  
240 in phagocytosis (Wähe *et al.* 2010). Two downregulated transcripts (BTT35021\_1, BTT08756\_1)  
241 were matched to *croquemort*. *Croquemort*, which codes for a scavenger receptor is a key part of  
242 the Imd pathway but in its apoptotic phagocytosis role not its immune one (Franc *et al.* 1999).  
243 Annexin IX (downregulated BTT02025\_1) has been shown to be induced by septic injury in  
244 *Drosophila*. It is thought to encode for an anticoagulant (Gregorio *et al.* 2001).

245

246 *Miscellaneous:*

247 Major royal jelly protein (BTT05317\_2, BTT36365\_1 upregulated) has been shown to have  
248 antimicrobial properties and to be expressed in response to bacterial infection in honeybees  
249 (Scharlaken *et al.* 2007; Buttstedt *et al.* 2013). Vitellogenin (downregulated BTT36006\_1) is a  
250 potent regulator of the immune response in honeybees (Amdam *et al.* 2004). Several orthologs of  
251 putative *Drosophila* immune loci were found to be differentially expressed 24 hours post-infection  
252 (CG12505: BTT00934\_1, CG18348: BTT04397\_1, CG7296: BTT15035\_1, BTT18395\_1,  
253 CG8791: BTT18908\_1, CG5527: BTT35653\_1, Fst: BTT11511\_1). The downregulated CG4393

254 (BTT05817\_1) is weakly analogous to TNF receptor associated factor 3 (TRAF3) that mediates  
255 signal transduction involved in mammalian immune responses. Downregulated BTT37289\_1 codes  
256 for a putative fatty acyl-CoA reductase.

257

### 258 ***Genes differentially expressed between 24 hours post-infection and 48 hours post-infection***

259 43 transcripts were found to be differentially expressed between 24 hours post-infection and 48  
260 hours post-infection. Of these 17 had no BLAST hits. A further six had uninformative BLAST hits  
261 (anonymous predicted protein). The remaining 20 were used in the analysis. Defense response was  
262 the only GO term significantly enriched (FDR= 0.00015), with seven transcripts. Three transcripts  
263 correspond to Hymenoptaecin (BTT18071\_1, BTT24170\_1,BTT24170\_2). They were all  
264 upregulated. This suggests a continuing strong AMP production 48 hours after infection. This  
265 agrees with other immune assays in bumblebees (Korner & Schmid-Hempel 2004). Argonaute-2, a  
266 RNA-silencing endonuclease, is involved in antiviral defense in insects (downregulated  
267 BTT02484\_1) (van Rij *et al.* 2006). GstD8, a glutathione S-transferase, is involved in the  
268 detoxification process (upregulated BTT04810\_1) (Gerardo *et al.* 2010). Dopa decarboxylase  
269 (upregulated BTT28048\_1) converts L-dopa to dopamine during the melanisation process (Ferdig *et*  
270 *al.* 2000). SCR-B9 (upregulated BTT40924\_1) codes for a scavenger receptor protein. Scavenger  
271 receptor proteins have been found to be microbial pattern recognition receptors in flies (Rämet *et al.*  
272 2001).

### 273 ***Genes differentially expressed depending on host genotype – parasite genotype interactions***

274 There were 591 differentially expressed transcripts (FDR < 0.05). Reannotating the transcripts  
275 using Blast2GO (blastx against the nr database with  $e < 0.001$ ), 150 had no BLAST hits. A further  
276 64 had uninformative BLAST hits (anonymous predicted protein). There were 109 transcripts that  
277 had previously been found to be differentially expressed at 24 hours post infection. Figure 3 shows  
278 a multidimensional scaling (MDS) plot of the samples based on the expression of these 591 genes.

279 It can be clearly seen that the 11 samples are grouped into their colony-strain interaction.

280

281 Of the 591 transcripts, 132 were upregulated and 459 were downregulated. Up or downregulation  
282 does not have the same meaning here as in the infected versus uninfected model where there was a  
283 clear baseline (uninfected). Depending on how you order the GLM we could get the reciprocal  
284 result. Our model used colony K strain 8 as the final contrast. From our previously published qPCR  
285 data (Riddell *et al.* 2009), we know the colony K strain 8 interaction displayed the highest levels of  
286 AMPs (effectors). Therefore when we say a transcript is upregulated, we mean it is upregulated in  
287 this high immune response interaction.

288

289 As with the infection data, we combined the BLAST searches against the IIID and nr databases.  
290 Ninety transcripts correspond to canonical insect immune genes. We again describe them in the  
291 order receptors, serine proteases, signalling pathways and effectors (Schmid-Hempel 2005).

292

293 *Receptors:*

294 Two transcripts were associated with gram negative binding proteins (upregulated GGBP,  
295 BTT03533\_1 and downregulated *GNBP1-2* BTT35513\_1) Although, as their name suggests,  
296 GNBP's are most associated with defense against gram negative bacteria, they have been shown to  
297 have a role in respond to *Plasmodium* infections (Tahar *et al.* 2002). C-type lectins (CTLs) bind  
298 carbohydrates and mediate processes including pathogen recognition (Cirimotich *et al.* 2010).  
299 CTL4 is agonist to *Plasmodium* infections in mosquitoes (Cirimotich *et al.* 2010). A CTL4  
300 transcript (BTT29328\_1) was found to be downregulated.

301

302 One downregulated transcript was related to *Dscam* (BTT12755\_1). A further fourteen  
303 downregulated transcripts were part of the Ig superfamily (IGFn3-1: BTT05561\_1, BTT05581\_1,  
304 BTT08682\_1, BTT12655\_1, BTT13442\_1, BTT14516\_1, BTT18750\_1, BTT21156\_1,

305 BTT22598\_1, BTT22819\_1, BTT23339\_1, BTT24070\_1, IGFn3-7: BTT08109\_1, BTT09498\_1)  
306 and one was upregulated (IGFn3-8: BTT03519\_1). *Dscam* and most of the other Ig superfamily  
307 transcripts cluster together in the top right of figure 4, suggesting they are similarly expressed.

308

309 *Serine proteases:*

310 28 transcripts related to serine proteases, serine protease homologues or serine protease inhibitors  
311 were differentially expressed (see Table 2).

312

313 *Signalling pathways:*

314 The Toll-like receptor *18Wheeler* (BTT35732\_1) was upregulated as was *Toll 10* (BTT09386\_1).  
315 *18Wheeler* has been shown to be important in the anti gram-negative immune response in  
316 *Drosophila* larvae (Ligoxygakis *et al.* 2002). *Dorsal 1A* (BTT04010\_1), a transcription factor that  
317 is a fundamental part of the Toll pathway, was downregulated. A transcript for *Spatzle 1-2* was  
318 downregulated (BTT10679\_1).

319

320 The tyrosine kinase *Pvr* (BTT04822\_1), which inhibits JNK activation (Bond & Foley 2009) was  
321 downregulated. *Jun*, a transcription factor of the JNK pathway was downregulated (BTT13636\_1).  
322 *Mpk2/p38a* (downregulated BTT16580\_1) and *MAPKKK9* (downregulated BTT04404\_1) are  
323 mitogen-activated protein kinases involved in the JNK Pathway and JAK/STAT pathways. We  
324 found two heat shock protein transcripts (BTT17371\_1, BTT22195\_1) and one other (BTT17701\_1)  
325 that were downregulated and upregulated respectively. These are all involved in the JAK/STAT  
326 pathway. *Akt 1* (downregulated BTT14188\_1) is part of the insulin/insulin-like growth factor 1  
327 signaling (IIS) cascade. IIS plays a critical role in the regulation of innate immunity. Activation of  
328 *Akt* signaling leads to a decrease in malaria infection intensity in mosquitoes (Corby-Harris *et al.*  
329 2010).

330

331 *Effectors:*

332 Five transcripts relate to the AMPs *defensin* (BTT06274\_2, BTT42034\_1) and hymenoptaecin  
333 (BTT18071\_1, BTT24170\_1, BTT24170\_2). They were all upregulated. An apidaecin precursor  
334 (BTT20828\_1) was upregulated. Hemolectin had three downregulated transcripts (BTT14194\_1,  
335 BTT17013\_1, BTT26614\_1) and one upregulated (BTT15326\_1). Argonaute-2, a RNA-silencing  
336 endonuclease, is involved in antiviral defense in insects (downregulated BTT02374\_1) (van Rij *et*  
337 *al.* 2006).

338

339 *Eater* encodes for a transmembrane receptor involved in phagocytosis in *Drosophila* (Kocks *et al.*  
340 2005). A transcript (BTT11132\_1) relating to *Eater* was upregulated. The melanisation process  
341 component Dopa decarboxylase (BTT19093\_1) was upregulated. Another enzyme involved in  
342 melanisation, laccase was found to be downregulated (BTT20241\_1, BTT33633\_1) (Arakane *et al.*  
343 2005).

344

345 *Cyp4p3* transcript BTT40653\_1 was upregulated. Two previously unseen *Cyp4p3* transcripts  
346 (BTT05254\_1, BTT20622\_2) were upregulated and one (BTT36257\_1) downregulated. *TPX4*  
347 (BTT13285\_1) that codes for a Thioredoxin-dependent peroxidase was downregulated.

348

349 *Miscellaneous:*

350 A small number of transcripts were related to chitin metabolism. SCRASP1 has a chitin-binding  
351 domain that has been hypothesized to sense chitin in response to injury and to transduce signals via  
352 the serine protease domain (Blumberg *et al.* 2013). We found an upregulated transcript related to  
353 *SCRASP 1* (BTT41923\_1). A peritrophin precursor was also upregulated (BTT10727\_1). As was a  
354 chitinase 3 transcript (BTT23246\_1).

355

356 *Retinoid and fatty-acid-binding protein (RfaBp)* (BTT07678\_1) was downregulated. RfaBp was



357 found to be upregulated upon injection of LPS in *Drosophila* during a proteomic study (Vierstraete  
358 *et al.* 2004). *Notch* (upregulated BTT09545\_1) is involved in the specification of crystal cells in  
359 *Drosophila melanogaster* (Mukherjee *et al.* 2011). Several orthologs of putative *Drosophila*  
360 immune loci were found to be differentially expressed (CG5527: BTT08512\_1, CG12505:  
361 BTT00934\_1, CG13323: BTT38025\_1, BTT38087\_1, CG17560: BTT02877\_1 downregulated,  
362 BTT05845\_1 upregulated, CG18348: BTT20843\_1)  
363

364 **Discussion**

365 We present a comprehensive transcriptomic analysis of gene expression in this important model  
366 host-parasite system. We have identified a large number of bumblebee genes whose expression are  
367 changed upon infection with *Crithidia*. We have also found a large number of genes whose  
368 expression depends on the interaction between host and parasite genotypes, that is show specificity.

369

370 We confirmed the importance of antimicrobial peptides in the specific defense against *Crithidia*  
371 (Riddell *et al.* 2009, 2011; Deshwal & Mallon 2014). It is also clear that several other effectors  
372 including ROS and phagocytosis may be important. Several immune pathways seem to be  
373 important in the anti-*Crithidia* response. These include the Toll, Imd and JAK/STAT pathways.  
374 Toll especially seems to be important in a specific immune response.

375

376 There are a larger proportion of receptor transcripts found in the specificity analysis (3.2% 19/591)  
377 compared to the infection analysis (1.2% 6/489). This is not surprising, as we would expect a  
378 specific immune response to a given strain to be based mainly on how it is recognised. Although  
379 several receptors, including GNBPs and lectins, are differentially expressed, the most exciting  
380 discovery is the large number of transcripts related to *Dscam*. The Down syndrome cell adhesion  
381 molecule (*Dscam*), a pattern recognition receptor has come to the forefront of research into insect  
382 immune specificity as it has been found to have thousands of different splice forms and is  
383 associated with insect immunity (Smith *et al.* 2011). In the fruit fly *Drosophila*, silencing of *Dscam*  
384 retards the insect's capacity to engulf bacteria by phagocytosis (Watson *et al.* 2005). In *Anopheles*,  
385 the *Dscam* splice forms produced in response to parasite exposure differs between bacteria and  
386 *Plasmodium* and between *Plasmodium berghei* and *Plasmodium falciparum* (Dong *et al.* 2006).  
387 This has been tempered by the finding that *Dscam* diversity does not increase with exposure to  
388 increasing heterogeneity of *Plasmodium falciparum* genotypes (Smith *et al.* 2011). Recently it has  
389 been shown that *Dscam* specificity is mediated by specific splice-factors transcription downstream

390 of activation of the Toll and Imd pathways (Dong *et al.* 2012). Our results suggest that *Dscam* may  
391 be important in differentiating strains of the trypanosome *Crithidia bombi*.

392

393 We found a number of genes associated with chitin metabolism. The peritrophic matrix may be  
394 fundamental in the bee's defense against *Crithidia*. The peritrophic matrix acts as an immunological  
395 barrier against trypanosomes. Tsetse flies with an underdeveloped PM have lower levels of  
396 refractoriness to trypanosome infections (Weiss *et al.* 2013). This is due to a premature immune  
397 response; the trypanosomes get through the PM quicker and stimulate the immune response at an  
398 earlier stage compared to refractory flies.

399

400 A similar study has recently been published (Barribeau *et al.* 2014). Although they find genotype x  
401 genotype interactions in gene expression, it is in a much smaller number of genes. None of these  
402 genes offer a potential model for generating specificity. We hypothesise that our much larger  
403 catalogue of genes, including *Dscam*, is due to our experimental design. We used a 2x2 analysis of  
404 preselected reciprocal host-parasite interactions. This increased our likelihood of detecting  
405 differential expression using RNA-seq compared to a less directed sample collection.

406

407 Given that we have found that the bees own physiology, especially its immune response is vital in  
408 both the defense against *Crithidia* and in explaining the host-parasite specificity, how do we  
409 incorporate recent findings that the bees gut microbiota are important in exactly these phenomena  
410 (Koch & Schmid-Hempel 2011, 2012). Gut microbiota impact the condition of the PM and gut  
411 epithelium generally (Buchon *et al.* 2009a; Weiss *et al.* 2013). It has recently been suggested that  
412 the components of the peritrophic matrix may be under the control of various immune pathways,  
413 Imd (Buchon *et al.* 2009b) and STAT (Narasimhan *et al.* 2014) explicitly. Gut microbiota stimulate  
414 these pathways keeping the PM intact. The intact peritrophic matrix then acts as a physical barrier  
415 to colonization by parasites. Future work will focus on understanding the interactions of this

416 triumvirate of host genotype, parasite genotype and gut microbiota and their effect on disease  
417 outcome.  
418

419 Acknowledgements

420 Thanks to S. Barribeau & P. Schmid-Hempel for discussions. CR was funded by a BBSRC  
421 studentship. This work was partially funded through a NERC NBAF pilot grant (NBAF606) to  
422 EBM.

423

424

425

426

## 427 References

- Amdam GV, Simões ZLP, Hagen A *et al.* (2004) Hormonal control of the yolk precursor vitellogenin regulates immune function and longevity in honeybees. *Experimental Gerontology*, **39**, 767–773.
- Arakane Y, Muthukrishnan S, Beeman RW, Kanost MR, Kramer KJ (2005) Laccase 2 is the phenoloxidase gene required for beetle cuticle tanning. *Proceedings of the National Academy of Sciences of the United States of America*, **102**, 11337–11342.
- Barribeau SM, Sadd BM, Plessis L du, Schmid-Hempel P (2014) Gene expression differences underlying genotype-by-genotype specificity in a host–parasite system. *Proceedings of the National Academy of Sciences*, 201318628.
- Barribeau SM, Schmid-Hempel P (2013) Qualitatively different immune response of the bumblebee host, *Bombus terrestris*, to infection by different genotypes of the trypanosome gut parasite, *Crithidia bombi*. *Infection, Genetics and Evolution*, **20**, 249–256.
- Baton LA, Robertson A, Warr E, Strand MR, Dimopoulos G (2009) Genome-wide transcriptomic profiling of *Anopheles gambiae* hemocytes reveals pathogen-specific signatures upon bacterial challenge and *Plasmodium berghei* infection. *BMC Genomics*, **10**, 257.
- Blumberg BJ, Trop S, Das S, Dimopoulos G (2013) Bacteria- and IMD Pathway-Independent Immune Defenses against *Plasmodium falciparum* in *Anopheles gambiae*. *PLoS ONE*, **8**.
- Bond D, Foley E (2009) A quantitative RNAi screen for JNK modifiers identifies Pvr as a novel regulator of *Drosophila* immune signaling. *PLoS pathogens*, **5**, e1000655.
- Brucker RM, Funkhouser LJ, Setia S, Pauly R, Bordenstein SR (2012) Insect Innate Immunity Database (IIID): An Annotation Tool for Identifying Immune Genes in Insect Genomes. *PLoS ONE*, **7**, e45125.
- Brunner FS, Schmid-Hempel P, Barribeau SM (2013) Immune Gene Expression in *Bombus terrestris*: Signatures of Infection Despite Strong Variation among Populations, Colonies, and Sister Workers. *PLoS ONE*, **8**, e68181.

- Buchon N, Broderick NA, Chakrabarti S, Lemaitre B (2009a) Invasive and indigenous microbiota impact intestinal stem cell activity through multiple pathways in *Drosophila*. *Genes & Development*, **23**, 2333–2344.
- Buchon N, Broderick NA, Poidevin M, Pradervand S, Lemaitre B (2009b) *Drosophila* Intestinal Response to Bacterial Infection: Activation of Host Defense and Stem Cell Proliferation. *Cell Host & Microbe*, **5**, 200–211.
- Buttstedt A, Moritz RFA, Erler S (2013) Origin and function of the major royal jelly proteins of the honeybee (*Apis mellifera*) as members of the yellow gene family. *Biological Reviews*, n/a–n/a.
- Carius HJ, Little TJ, Ebert D (2001) Genetic variation in a host-parasite association: Potential for coevolution and frequency-dependent selection. *Evolution*, **55**, 1136–1145.
- Chen J, Xie C, Tian L *et al.* (2010) Participation of the p38 pathway in *Drosophila* host defense against pathogenic bacteria and fungi. *Proceedings of the National Academy of Sciences*, **107**, 20774–20779.
- Cirimotich CM, Dong Y, Garver LS, Sim S, Dimopoulos G (2010) Mosquito immune defenses against *Plasmodium* infection. *Developmental & Comparative Immunology*, **34**, 387–395.
- Colgan TJ, Carolan JC, Bridgett SJ *et al.* (2011) Polyphenism in social insects: insights from a transcriptome-wide analysis of gene expression in the life stages of the key pollinator, *Bombus terrestris*. *BMC Genomics*, **12**, 623.
- Corby-Harris V, Drexler A, Watkins de Jong L *et al.* (2010) Activation of Akt Signaling Reduces the Prevalence and Intensity of Malaria Parasite Infection and Lifespan in *Anopheles stephensi* Mosquitoes. *PLoS Pathog*, **6**, e1001003.
- Danielli A, Loukeris TG, Lagueux M *et al.* (2000) A modular chitin-binding protease associated with hemocytes and hemolymph in the mosquito *Anopheles gambiae*. *Proceedings of the National Academy of Sciences*, **97**, 7136–7141.
- Deshwal S, Mallon EB (2014) Antimicrobial peptides play a functional role in bumblebee anti-

- trypanosome defense. *Developmental & Comparative Immunology*, **42**, 240–243.
- Dijkers PF, O'Farrell PH (2007) Drosophila Calcineurin Promotes Induction of Innate Immune Responses. *Current Biology*, **17**, 2087–2093.
- Dinglasan RR, Devenport M, Florens L *et al.* (2009) The Anopheles gambiae adult midgut peritrophic matrix proteome. *Insect Biochemistry and Molecular Biology*, **39**, 125–134.
- Dong Y, Cirimotich CM, Pike A, Chandra R, Dimopoulos G (2012) Anopheles NF- $\kappa$ B-regulated splicing factors direct pathogen-specific repertoires of the hypervariable pattern recognition receptor AgDscam. *Cell Host and Microbe*, **12**, 521–530.
- Dong YM, Taylor HE, Dimopoulos G (2006) AgDscam, a hypervariable immunoglobulin domain-containing receptor of the Anopheles gambiae innate immune system. *Plos Biology*, **4**, 1137–1146.
- Felix R, Silveira H (2012) The Role of Anopheles gambiae P450 Cytochrome in Insecticide Resistance and Infection. In: *Insecticides - Pest Engineering*. InTech.
- Ferdig MT, Taft AS, Smartt CT *et al.* (2000) Aedes aegypti dopa decarboxylase: gene structure and regulation. *Insect molecular biology*, **9**, 231–239.
- Franc NC, Heitzler P, B RA, Ezekowitz, White K (1999) Requirement for Croquemort in Phagocytosis of Apoptotic Cells in Drosophila. *Science*, **284**, 1991–1994.
- Gerardo NM, Altincicek B, Anselme C *et al.* (2010) Immunity and other defenses in pea aphids, Acyrthosiphon pisum. *Genome Biology*, **11**, R21.
- Götz S, García-Gómez JM, Terol J *et al.* (2008) High-throughput functional annotation and data mining with the Blast2GO suite. *Nucleic Acids Research*, **36**, 3420–3435.
- Gregorio ED, Spellman PT, Rubin GM, Lemaitre B (2001) Genome-wide analysis of the Drosophila immune response by using oligonucleotide microarrays. *Proceedings of the National Academy of Sciences*, **98**, 12590–12595.
- Gschwend TP, Krueger SR, Kozlov SV, Wolfer DP, Sonderegger P (1997) Neurotrypsin, a Novel Multidomain Serine Protease Expressed in the Nervous System. *Molecular and Cellular*



*Neuroscience*, **9**, 207–219.

- Hamilton WD, Henderson PA, Moran NA (1981) Fluctuation of environment and coevolved antagonist polymorphism as factors in the maintenance of sex. In: *Natural Selection and Social Behavior* (eds Alexander RD, Tinkle DW), pp. 363–381. Chiron Press, New York.
- Hauton C, Smith VJ (2007) Adaptive immunity in invertebrates: a straw house without a mechanistic foundation. *Bioessays*, **29**, 1138–1146.
- Isogai Z, Ono RN, Ushiro S *et al.* (2003) Latent transforming growth factor  $\beta$ -binding protein 1 interacts with fibrillin and is a microfibril-associated protein. *Journal of Biological Chemistry*, **278**, 2750–2757.
- Jacobslorena M, Lemos FJA (1995) Immunological Strategies for Control of Insect Disease Vectors - a Critical-Assessment. *Parasitology Today*, **11**, 144–147.
- Johansen KA, Iwaki DD, Lengyel JA (2003) Localized JAK/STAT signaling is required for oriented cell rearrangement in a tubular epithelium. *Development*, **130**, 135–145.
- Karkali K, Panayotou G (2012) The Drosophila DUSP Puckered is phosphorylated by JNK and p38 in response to arsenite-induced oxidative stress. *Biochemical and Biophysical Research Communications*, **418**, 301–306.
- Koch H, Schmid-Hempel P (2011) Socially transmitted gut microbiota protect bumble bees against an intestinal parasite. *Proceedings of the National Academy of Sciences*, **108**, 19288–19292.
- Koch H, Schmid-Hempel P (2012) Gut microbiota instead of host genotype drive the specificity in the interaction of a natural host-parasite system. *Ecology letters*, **15**, 1095–1103.
- Kocks C, Cho JH, Nehme N *et al.* (2005) Eater, a Transmembrane Protein Mediating Phagocytosis of Bacterial Pathogens in Drosophila. *Cell*, **123**, 335–346.
- Korner P, Schmid-Hempel P (2004) In vivo dynamics of an immune response in the bumble bee *Bombus terrestris*. *Journal of Invertebrate Pathology*, **87**, 59–66.
- Kuraishi T, Binggeli O, Opota O, Buchon N, Lemaitre B (2011) Genetic evidence for a protective role of the peritrophic matrix against intestinal bacterial infection in Drosophila

- melanogaster. *Proceedings of the National Academy of Sciences of the United States of America*, **108**, 15966–15971.
- Kurtz J (2005) Specific memory within innate immune systems. *Trends in Immunology*, **26**, 186–192.
- Lambrechts L (2010) Dissecting the Genetic Architecture of Host-Pathogen Specificity. *PLOS Pathogens*, **6**.
- Lehane MJ (1997) Peritrophic matrix structure and function. *Annual review of entomology*, **42**, 525–550.
- Lemaitre B, Hoffmann J (2007) The host defense of *Drosophila melanogaster*. *Annual Review of Immunology*, **25**, 697–743.
- Lesch C, Goto A, Lindgren M *et al.* (2007) A role for Hemolactin in coagulation and immunity in *Drosophila melanogaster*. *Developmental and comparative immunology*, **31**, 1255–1263.
- Levashina EA, Langley E, Green C *et al.* (1999) Constitutive Activation of Toll-Mediated Antifungal Defense in Serpin-Deficient *Drosophila*. *Science*, **285**, 1917–1919.
- Ligoxygakis P, Bulet P, Reichhart J-M (2002) Critical evaluation of the role of the Toll-like receptor 18-Wheeler in the host defense of *Drosophila*. *EMBO reports*, **3**, 666–673.
- McCarthy DJ, Chen, Y., Smyth GK (2012) Differential expression analysis of multifactor RNA-Seq experiments with respect to biological variation. *Nucleic Acids Research*, **40**, 4288–4297.
- Molina-Cruz A, DeJong RJ, Charles B *et al.* (2008) Reactive oxygen species modulate *Anopheles gambiae* immunity against bacteria and Plasmodium. *The Journal of biological chemistry*, **283**, 3217–3223.
- Mukherjee T, Kim WS, Mandal L, Banerjee U (2011) Interaction between Notch and Hif- $\alpha$  in development and survival of *Drosophila* blood cells. *Science (New York, N.Y.)*, **332**, 1210–1213.
- Narasimhan S, Rajeevan N, Liu L *et al.* (2014) Gut Microbiota of the Tick Vector *Ixodes scapularis* Modulate Colonization of the Lyme Disease Spirochete. *Cell Host & Microbe*, **15**, 58–71.

- R Core Team (2013) *R: A language and environment for statistical computing*. R foundation for statistical computing, Vienna, Austria.
- Ragab A, Buechling T, Gesellchen V *et al.* (2011) Drosophila Ras/MAPK signalling regulates innate immune responses in immune and intestinal stem cells. *The EMBO Journal*, **30**, 1123–1136.
- Rämet M, Pearson A, Manfruelli P *et al.* (2001) Drosophila scavenger receptor CI is a pattern recognition receptor for bacteria. *Immunity*, **15**, 1027–1038.
- Riddell C, Adams S, Schmid-Hempel P, Mallon EB (2009) Differential Expression of Immune Defences Is Associated with Specific Host-Parasite Interactions in Insects. *PLoS ONE*, **4**, e7621.
- Riddell CE, Sumner S, Adams S, Mallon EB (2011) Pathways to immunity: Temporal dynamics of the bumblebee (*Bombus terrestris*) immune response against a trypanosomal gut parasite. *Insect Molecular Biology*, **20**, 529–540.
- Van Rij RP, Saleh M-C, Berry B *et al.* (2006) The RNA silencing endonuclease Argonaute 2 mediates specific antiviral immunity in *Drosophila melanogaster*. *Genes & development*, **20**, 2985–2995.
- Scharlaken B, De Graaf DC, Memmi S *et al.* (2007) Differential protein expression in the honey bee head after a bacterial challenge. *Archives of Insect Biochemistry and Physiology*, **65**, 223–237.
- Schlüns H, Sadd BM, Schmid-Hempel P, Crozier RH (2010) Infection with the trypanosome *Crithidia bombi* and expression of immune-related genes in the bumblebee *Bombus terrestris*. *Developmental and comparative immunology*, **34**, 705–709.
- Schmid-Hempel P (2001) On the evolutionary ecology of host-parasite interactions: addressing the question with regard to bumblebees and their parasites. *Naturwissenschaften*, **88**, 147–158.
- Schmid-Hempel P (2005) Natural insect host-parasite systems show immune priming and specificity: puzzles to be solved. *Bioessays*, **27**, 1026–1034.

- Schmid-Hempel P, Pühr K, Kruger N, Reber C, Schmid-Hempel R (1999) Dynamic and genetic consequences of variation in horizontal transmission for a microparasitic infection. *Evolution*, **53**, 426–434.
- Schmid-Hempel P, Reber-Funk C (2004) The distribution of genotypes of the trypanosome parasite, *Crithidia bombi*, in populations of its host *Bombus terrestris*. *Parasitology*, **129**, 147–158.
- Smith PH, Mwangi JM, Afrane YA *et al.* (2011) Alternative splicing of the *Anopheles gambiae* Dscam gene in diverse *Plasmodium falciparum* infections. *Malaria Journal*, **10**, 156.
- Soscia SJ, Kirby JE, Washicosky KJ *et al.* (2010) The Alzheimer's Disease-Associated Amyloid  $\beta$ -Protein Is an Antimicrobial Peptide. *PLoS ONE*, **5**, e9505.
- Soukup SF, Culi J, Gubb D (2009) Uptake of the Necrotic Serpin in *Drosophila melanogaster* via the Lipophorin Receptor-1. *PLoS Genet*, **5**, e1000532.
- Supek F, Bošnjak M, Škunca N, Šmuc T (2011) REVIGO Summarizes and Visualizes Long Lists of Gene Ontology Terms. *PLoS ONE*, **6**, e21800.
- Tahar R, Boudin C, Thiery I, Bourgouin C (2002) Immune response of *Anopheles gambiae* to the early sporogonic stages of the human malaria parasite *Plasmodium falciparum*. *The EMBO Journal*, **21**, 6673–6680.
- Takamatsu H, Kumanogoh A (2012) Diverse roles for semaphorin–plexin signaling in the immune system. *Trends in Immunology*, **33**, 127–135.
- Vierstraete E, Verleyen P, Baggerman G *et al.* (2004) A proteomic approach for the analysis of instantly released wound and immune proteins in *Drosophila melanogaster* hemolymph. *Proceedings of the National Academy of Sciences of the United States of America*, **101**, 470–475.
- Vlachou D, Schlegelmilch T, Christophides GK, Kafatos FC (2005) Functional genomic analysis of midgut epithelial responses in *Anopheles* during *Plasmodium* invasion. *Current biology: CB*, **15**, 1185–1195.
- Wähe A, Kasmapour B, Schmaderer C *et al.* (2010) Golgi-to-phagosome transport of acid

sphingomyelinase and prosaposin is mediated by sortilin. *Journal of Cell Science*, **123**, 2502–2511.

Watson FL, Püttmann-Holgado R, Thomas F *et al.* (2005) Extensive Diversity of Ig-Superfamily Proteins in the Immune System of Insects. *Science*, **309**, 1874–1878.

Weiss BL, Wang J, Maltz MA, Wu Y, Aksoy S (2013) Trypanosome Infection Establishment in the Tsetse Fly Gut Is Influenced by Microbiome-Regulated Host Immune Barriers. *PLoS Pathog*, **9**, e1003318.

Wu TD, Nacu S (2010) Fast and SNP-tolerant detection of complex variants and splicing in short reads. *Bioinformatics (Oxford, England)*, **26**, 873–881.

Yagi Y, Ip YT (2005) Helicase89B is a Mot1p/BTAF1 homologue that mediates an antimicrobial response in *Drosophila*. *EMBO reports*, **6**, 1088–1094.

Zhao P, Dong Z, Duan J *et al.* (2012) Genome-Wide Identification and Immune Response Analysis of Serine Protease Inhibitor Genes in the Silkworm, *Bombyx mori*. *PLoS ONE*, **7**, e31168.

Zou Z, Lopez DL, Kanost MR, Evans JD, Jiang H (2006) Comparative analysis of serine protease-related genes in the honey bee genome: possible involvement in embryonic development and innate immunity. *Insect Molecular Biology*, **15**, 603–614.

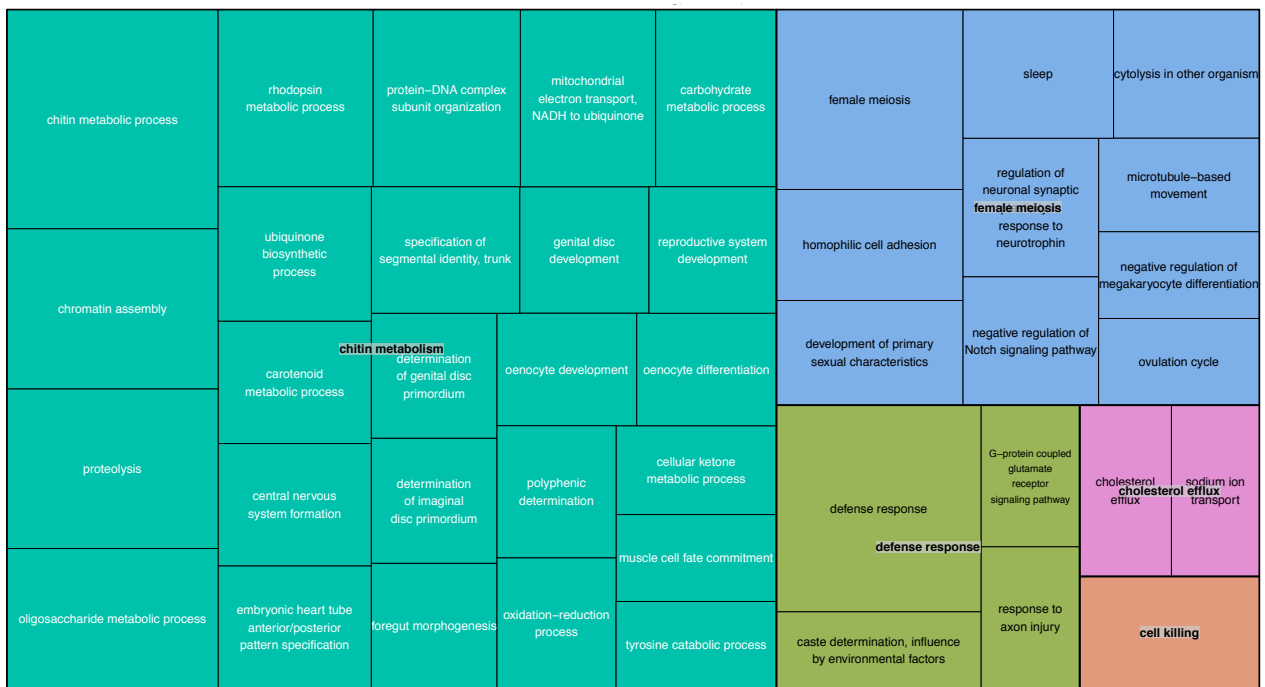

Figure 1 A summary of the enriched GO terms (based on Blast2Go annotation) found for differentially expressed genes at 24 hours post-infection compared to uninfected samples. This figure was produced using Revigo (Supek et al. 2011)

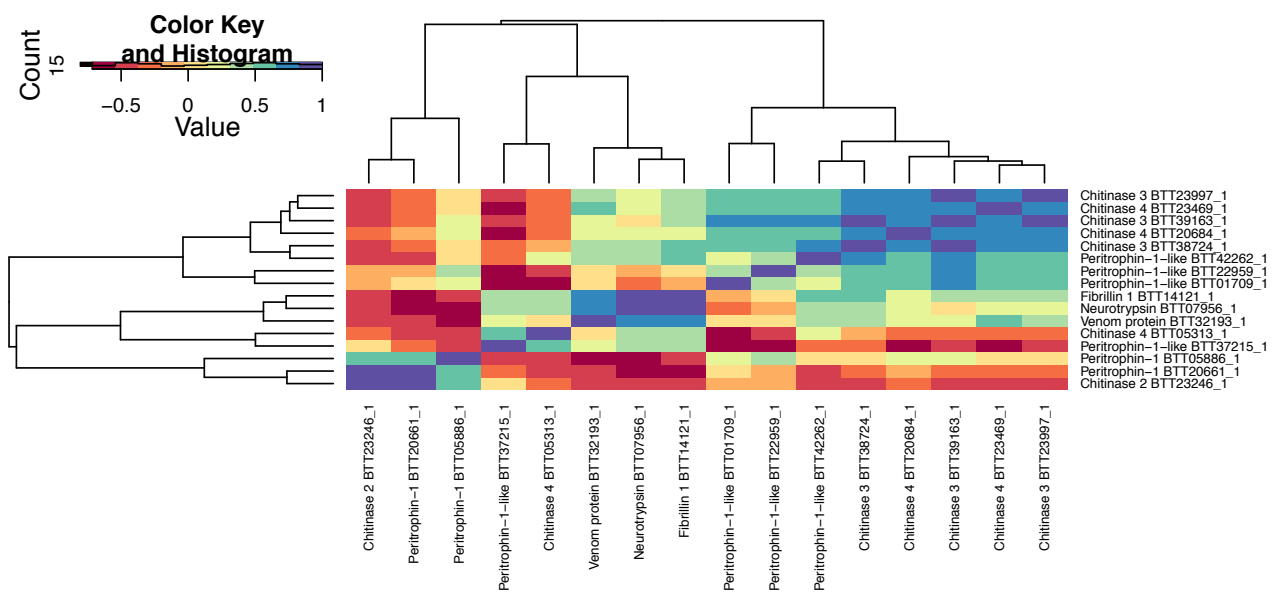

Figure 2. A heatmap showing the correlations of the expression patterns of the transcripts labelled as chitin metabolism genes that were differentially expressed twenty four hours after infection.

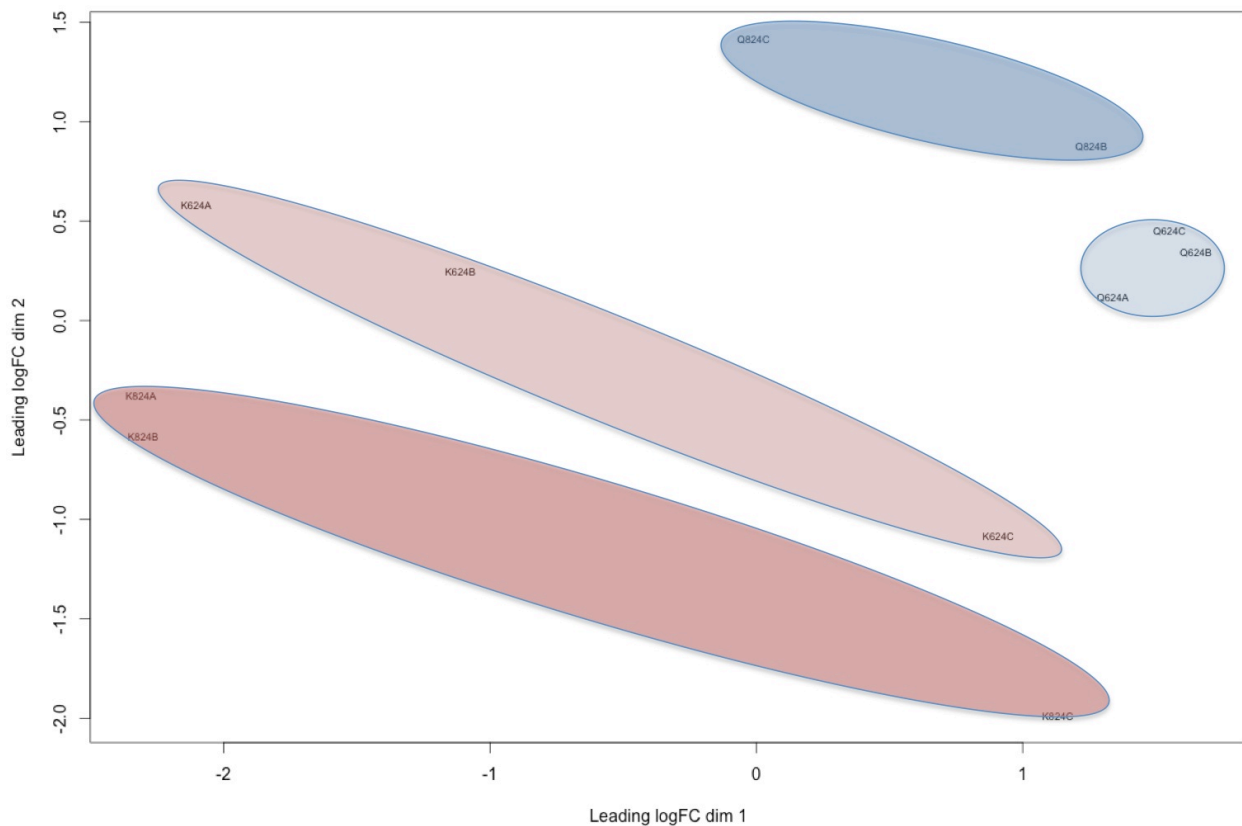

*Figure 3.* A multidimensional scaling (MDS) plot of the 11 samples used in the specificity analysis based on the expression of 591 differentially expressed transcripts. There are two colonies (K (red) and Q (blue)) and two *Crithidia* strains (6 (light) and 8 (dark)). Dimension 1 is the direction that best separates the samples. Dimension 2 is the next best direction, uncorrelated with the first, that separates the samples. The samples are clearly grouped into their colony-strain interactio



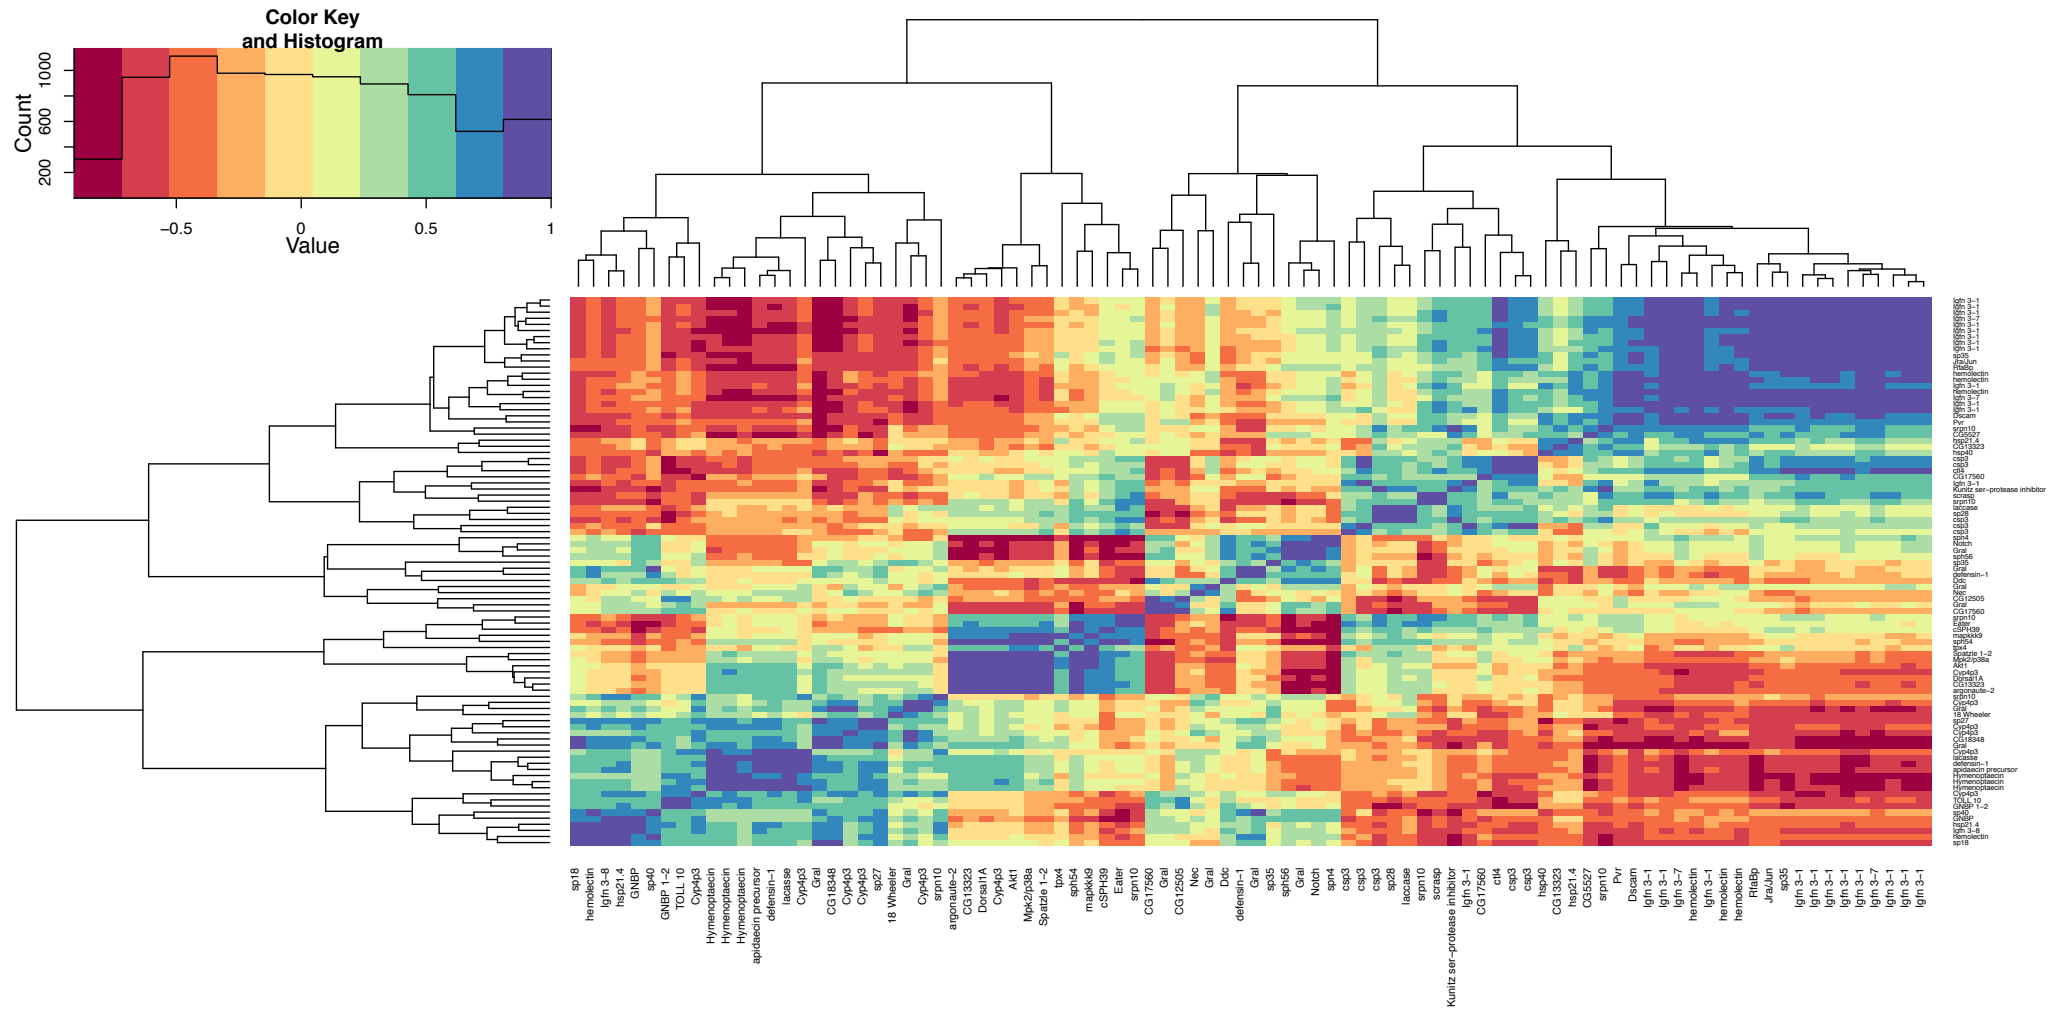

Figure 4. A heatmap showing the correlations of the expression patterns of the 90 transcripts labelled as immune genes in the analysis identifying genes differentially expressed depending on host genotype – parasite genotype interactions.

| Serine Proteases           | Upregulated | Downregulated                                                |
|----------------------------|-------------|--------------------------------------------------------------|
| CLIPA6                     |             | BTT20125_1                                                   |
| CLIPA7                     |             | BTT07313_1, BTT31897_1                                       |
| CLIPD5                     |             | BTT10579_1, BTT10912_1, BTT18247_1<br>BTT25711_1, BTT06803_1 |
| SP24                       | BTT03436_1  |                                                              |
| SP27                       |             | BTT08108_1, BTT38696_1                                       |
| SP35                       | BTT05300_1  |                                                              |
| Serine protease homologues | Upregulated | Downregulated                                                |
| SPH54                      | BTT01977_1  | BTT06125_1                                                   |
| Serine protease inhibitors | Upregulated | Downregulated                                                |
| NEC-like                   |             | BTT31997_1                                                   |
| spn4                       |             | BTT04130_1, BTT40693_1, BTT41025_1,<br>BTT41461_1            |
| SRPN10                     |             | BTT04508_1, BTT20259_1                                       |

*Table 1. List of transcriptions associated with serine proteases and serine protease inhibitors found to be differentially expressed twenty four hours post infection with Crithidia bombi.*

| Serine Proteases              | Upregulated                                                                        | Downregulated                                  |
|-------------------------------|------------------------------------------------------------------------------------|------------------------------------------------|
| cSp3                          | BTT35293_1                                                                         | BTT10579_1, BTT10912_1, BTT18247_1, BTT25711_1 |
| Sp18                          | BTT20808_1                                                                         |                                                |
| Sp27                          | BTT40251_1                                                                         |                                                |
| Sp28                          |                                                                                    | BTT20637_1                                     |
| Sp35                          | BTT05300_1                                                                         | BTT10155_1                                     |
| Sp40                          | BTT15256_1                                                                         |                                                |
| Tequilla/GRAL/Sp23            | BTT01709_1, BTT05886_1, BTT09081_1, BTT20661_1, BTT20725_1, BTT24359_1, BTT25071_1 |                                                |
| Serine protease homologues    | Upregulated                                                                        | Downregulated                                  |
| cSPH39                        |                                                                                    | BTT21868_1                                     |
| Sph54                         |                                                                                    | BTT27769_1                                     |
| Sph56                         | BTT17814_1                                                                         |                                                |
| Serine protease inhibitors    | Upregulated                                                                        | Downregulated                                  |
| Kunitz ser-protease inhibitor |                                                                                    | BTT14993_1                                     |
| necrotic (nec)                | BTT35742_1                                                                         |                                                |
| Spn 4                         |                                                                                    | BTT04130_1                                     |
| SRPN10                        |                                                                                    | BTT02607_1, BTT4508_1, BTT20259_1, BTT40693_1  |

Table 2. List of transcriptions associated with serine proteases and serine protease inhibitors found to be differentially expressed in the specificity analysis.
